# Supplementary material for: Synthesis and anti-glioblastoma effects of artemisinin-isothiocyanate derivatives
Source: PubMed Central journal article supplement — RSC Adv. 2018 Dec 7;8(71):40974–83. doi: 10.1039/c8ra08162j (PMC9091658; doi:10.1039/c8ra08162j), 2018-12-07
Supplement: RA-008-C8RA08162J-s001.pdf [file RA-008-C8RA08162J-s001.pdf]

## SUPPLEMENTARY MATERIAL

### Synthesis and Anti-glioblastoma Effects of Artemisinin- Isothiocyanate Derivatives

Chan Myae Nyein<sup>a,b,c,§</sup>, Xiaolin Zhong<sup>a,§</sup>, Junfeng Lu<sup>b</sup>, Huijuan Luo<sup>a</sup>, Jiamin Wang<sup>a</sup>,  
Simona Rapposelli<sup>e,f</sup>, Mingtao Li<sup>d</sup>, Ying Ou-yang<sup>g</sup>, Rongbiao Pi<sup>b,d\*</sup>, Xixin He<sup>a\*</sup>

<sup>a</sup> School of Pharmaceutical Sciences, Guangzhou University of Chinese Medicine, Guangzhou 510006, China

<sup>b</sup> School of Pharmaceutical Sciences, Sun Yat-Sen University, Guangzhou 510006, China

<sup>c</sup> Biotechnology Research Department, Ministry of Education, Kyauk-se, Myanmar

<sup>d</sup> Guangdong Provincial Key Laboratory of Brain Function and Disease, Zhongshan School of Medicine, Sun Yat-Sen University, Guangzhou, China.

<sup>e</sup> Department of Pharmacy, University of Pisa, Via Bonanno,6, 56126 Pisa, Italy.

<sup>f</sup> Interdepartmental Research Center for Biology and Pathology of Aging, University of Pisa, Via Bonanno,6, 56126 Pisa, Italy.

<sup>g</sup> Department of Pediatrics, Sun Yat-sen Memorial Hospital, Sun Yat-sen University, Guangzhou 510120, China

\*Corresponding author.

Email address: mark07@gzucm.edu.cn (X. He), pirb@mail.sysu.edu.cn (R. Pi)

§ These authors contributed equally to this work.



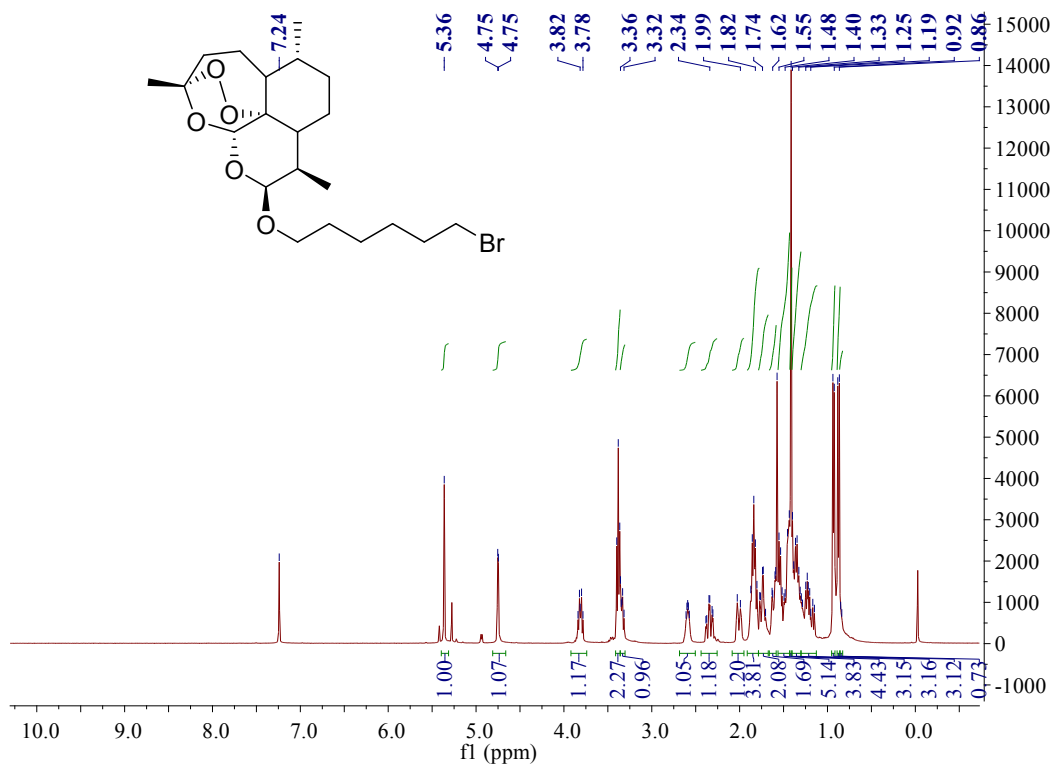

Figure S3.  $^1\text{H}$  NMR spectrum of compound 3c

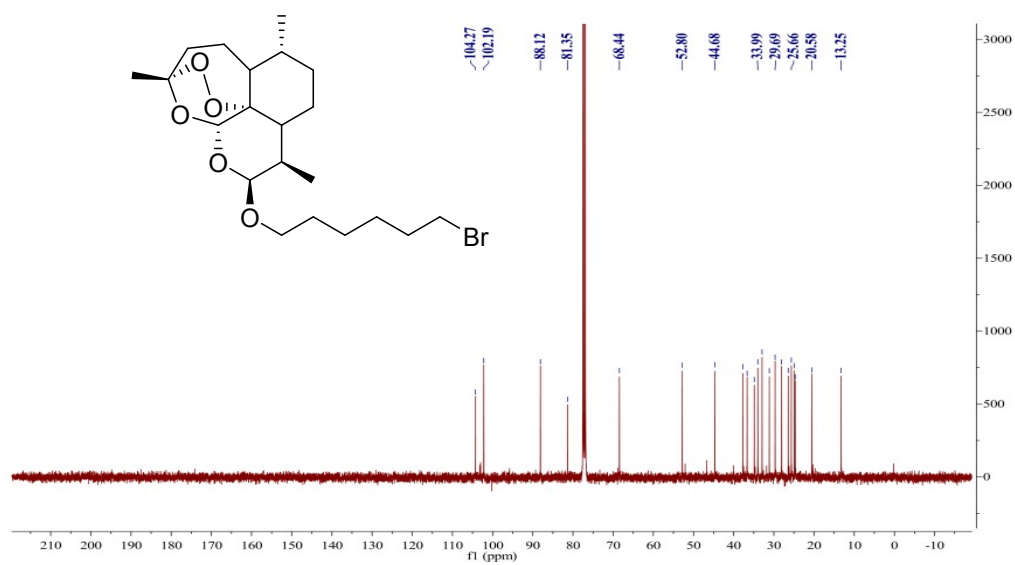

Figure S4.  $^{13}\text{C}$  NMR spectrum of compound 1c

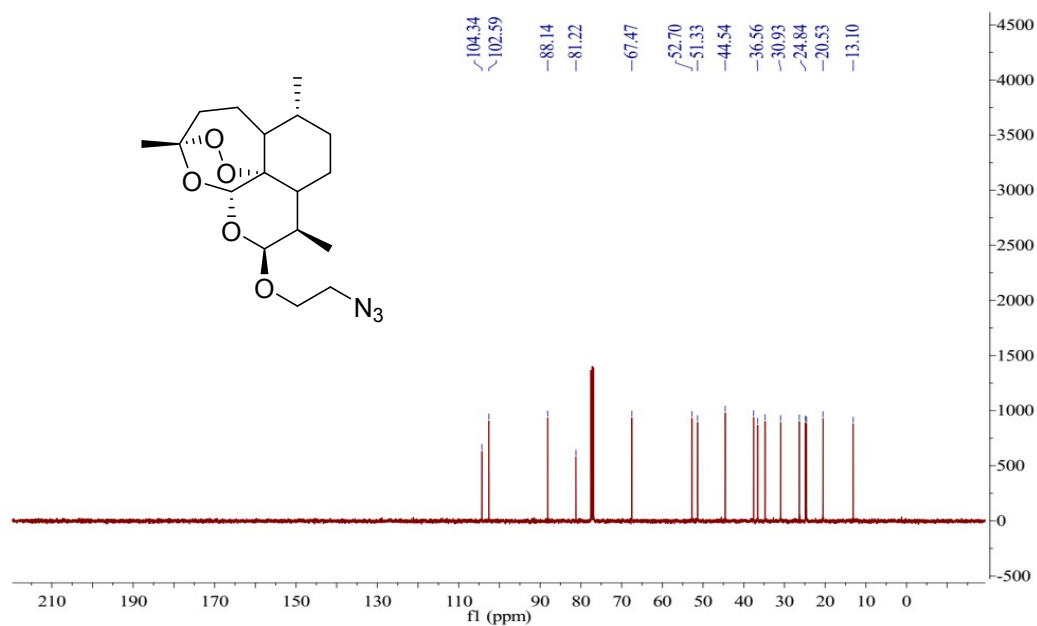

Figure S5. <sup>13</sup>C NMR spectrum of compound 3a

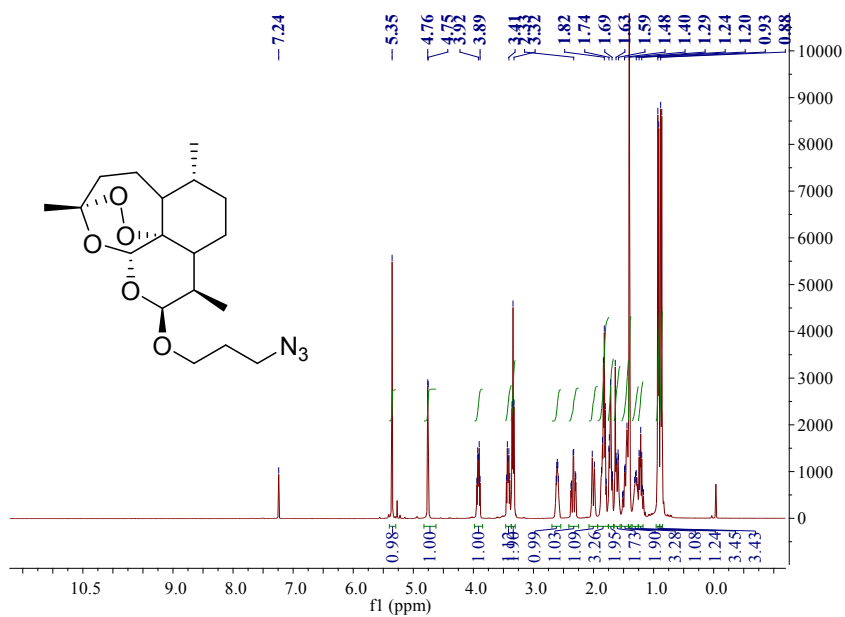

Figure S6. <sup>1</sup>H NMR spectrum of compound 3b

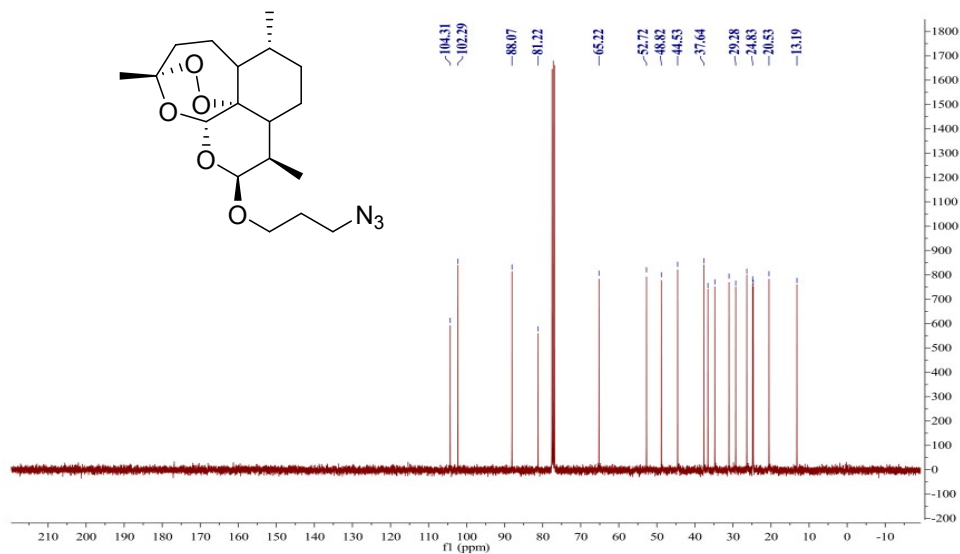

Figure S7.  $^{13}\text{C}$  NMR spectrum of compound 3b

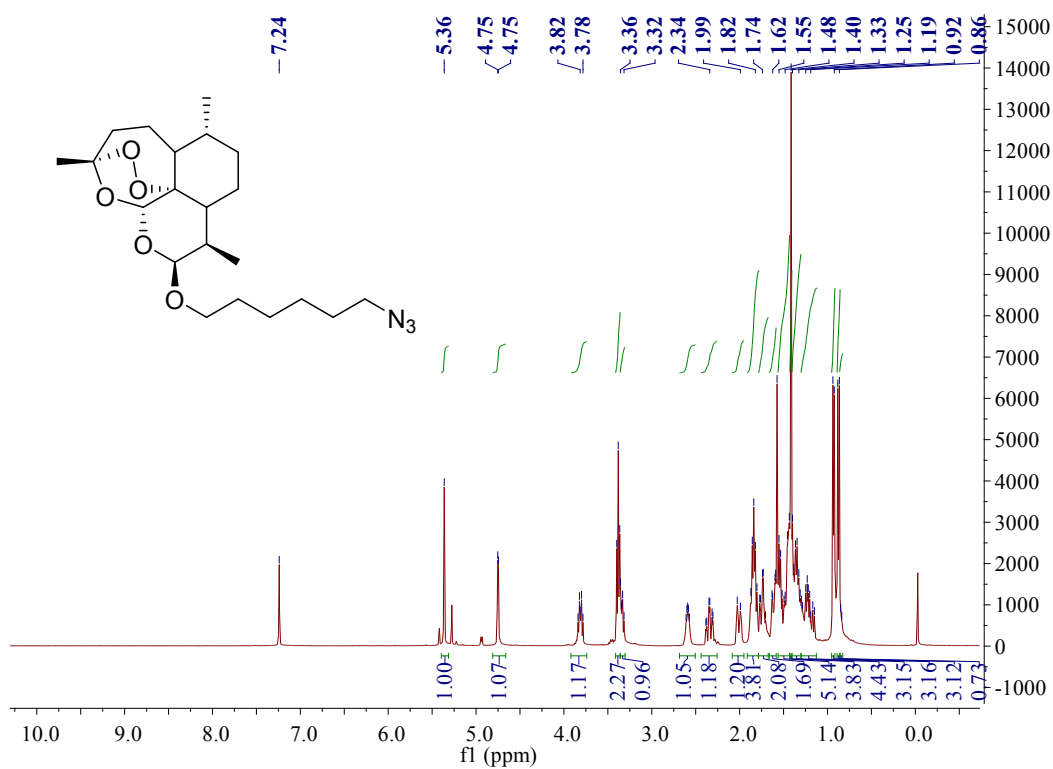

Figure S8.  $^1\text{H}$  NMR spectrum of compound 3c



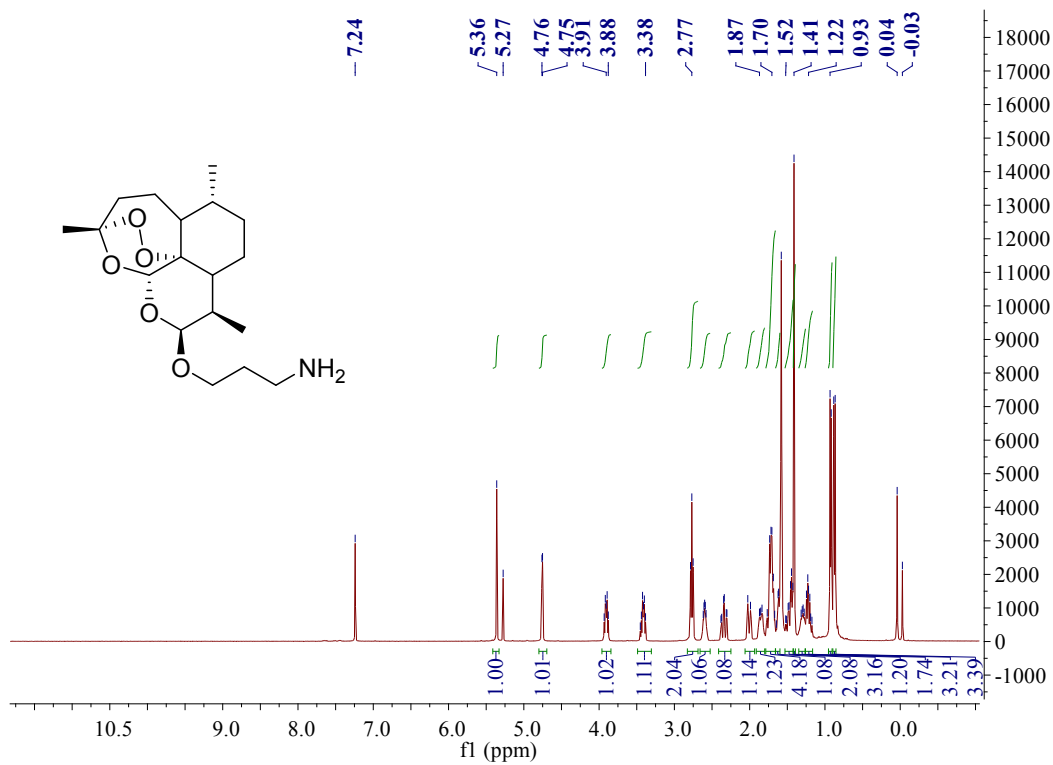

Figure S11. <sup>1</sup>H NMR spectrum of compound 4b

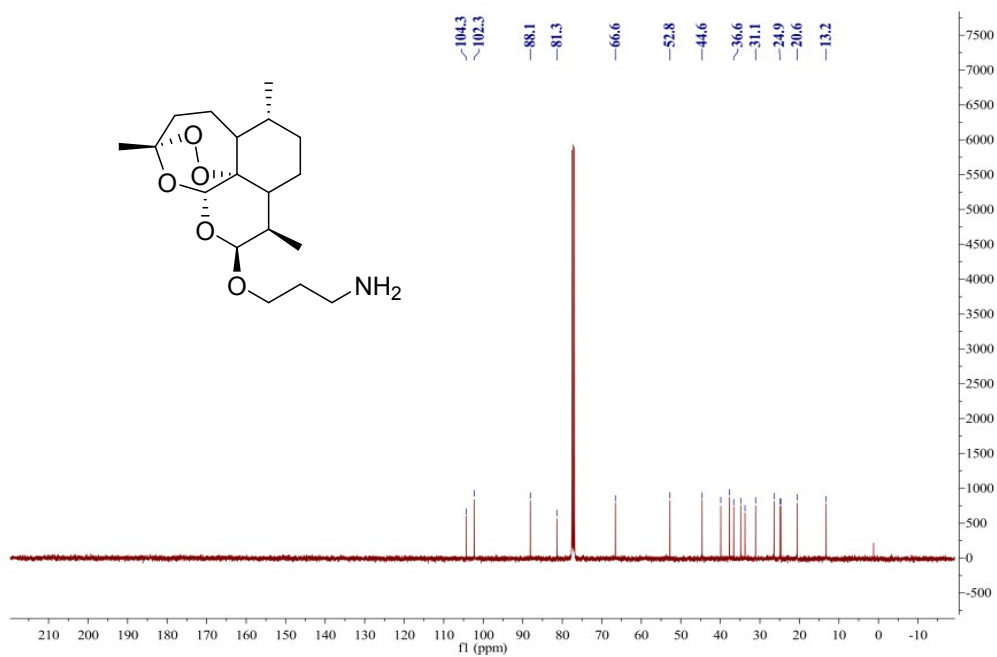

Figure S12. <sup>13</sup>C NMR spectrum of compound 4b

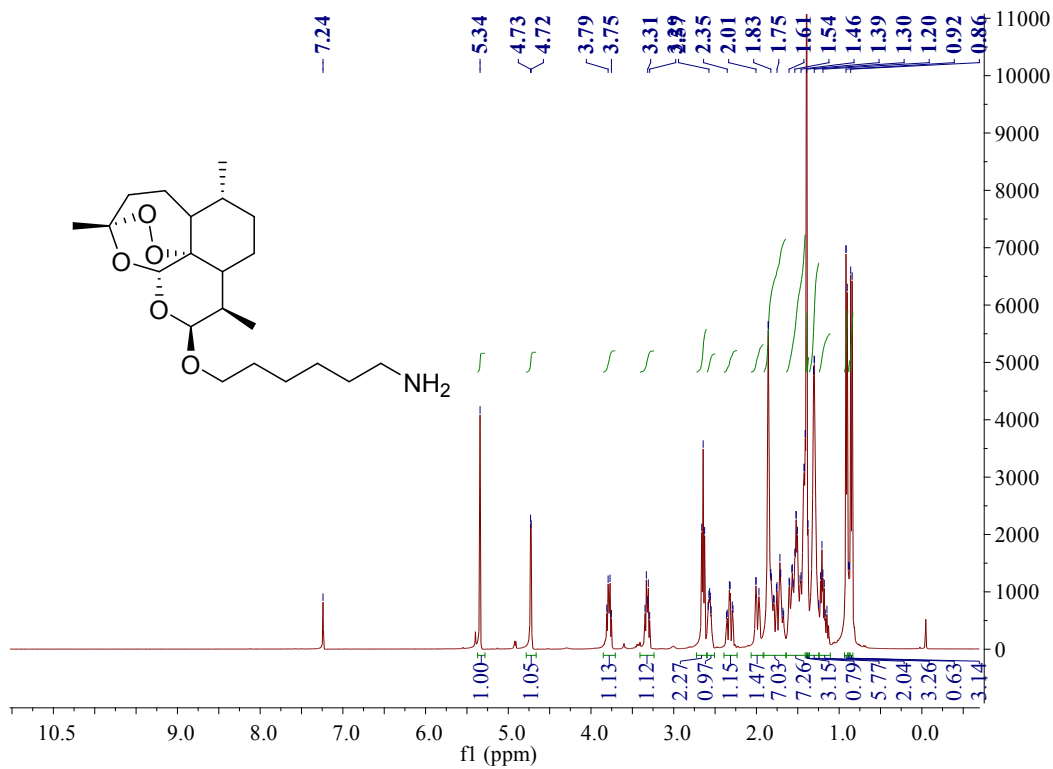

Figure S13. <sup>1</sup>H NMR spectrum of compound 4c

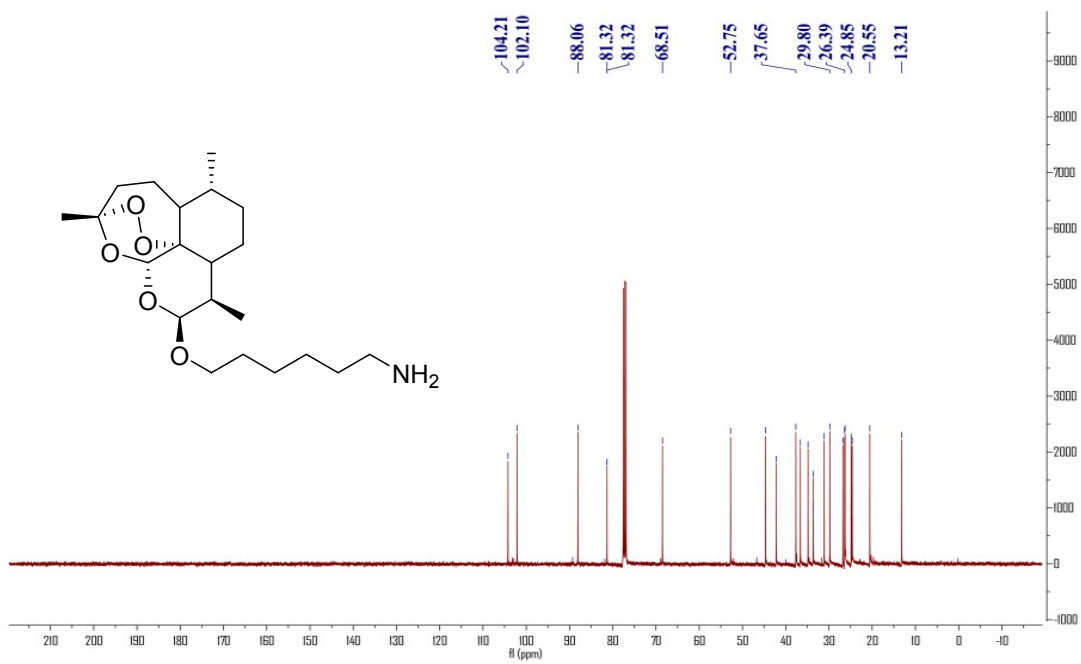

Figure S14. <sup>13</sup>C NMR spectrum of compound 4c



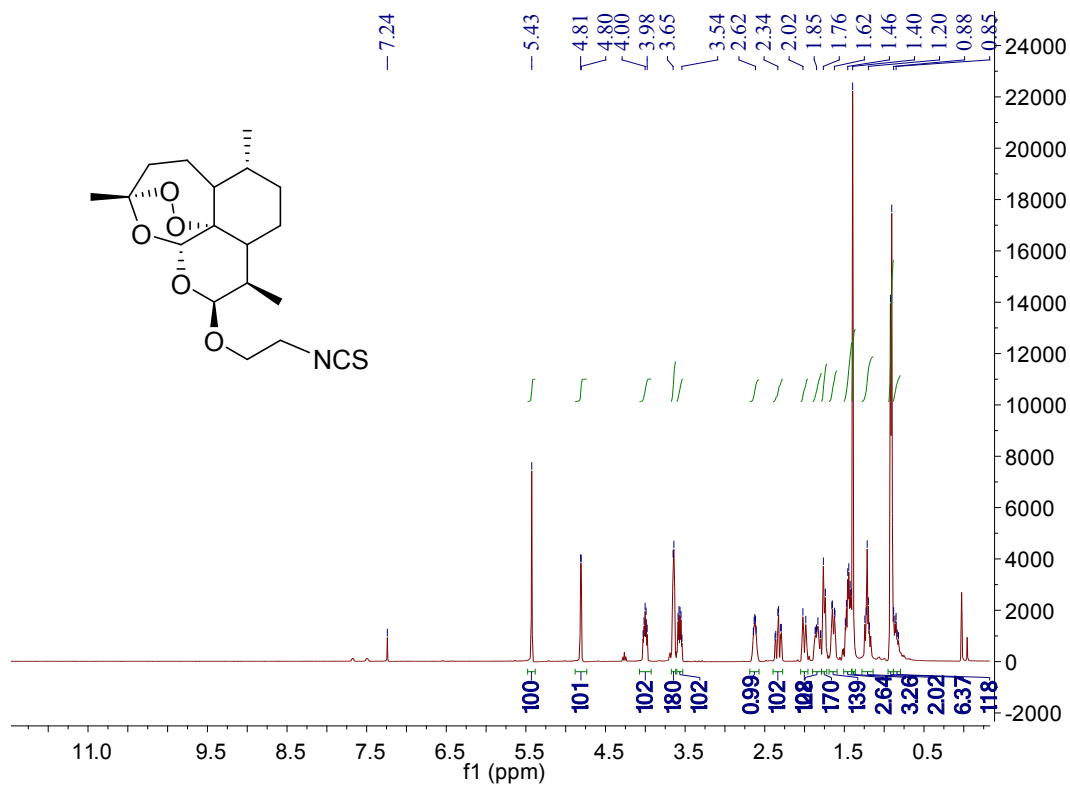

Figure S15.  $^1\text{H}$  NMR spectrum of compound 5a

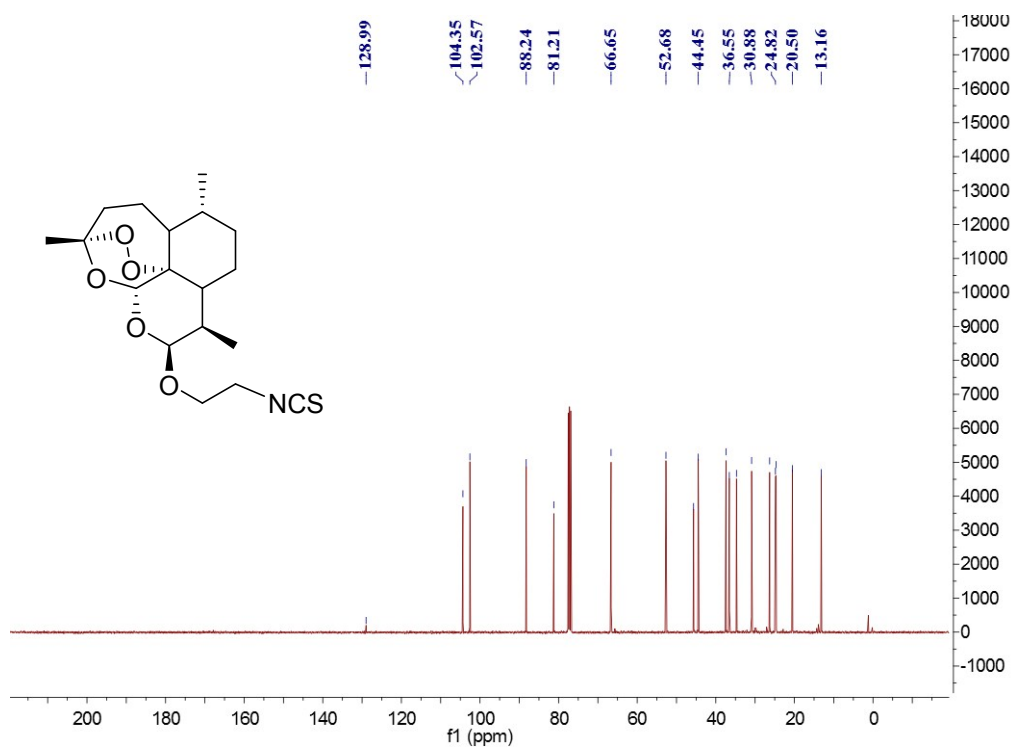

Figure S16.  $^{13}\text{C}$  NMR spectrum of compound 5a

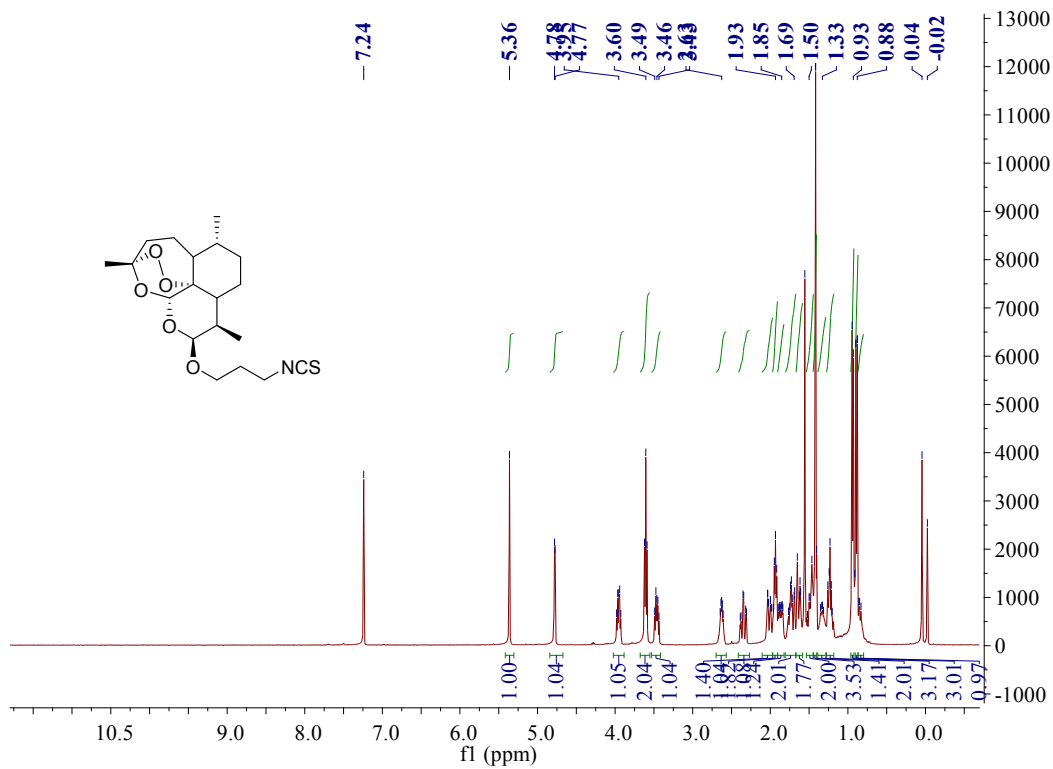

Figure S17. <sup>1</sup>H NMR spectrum of compound 5b

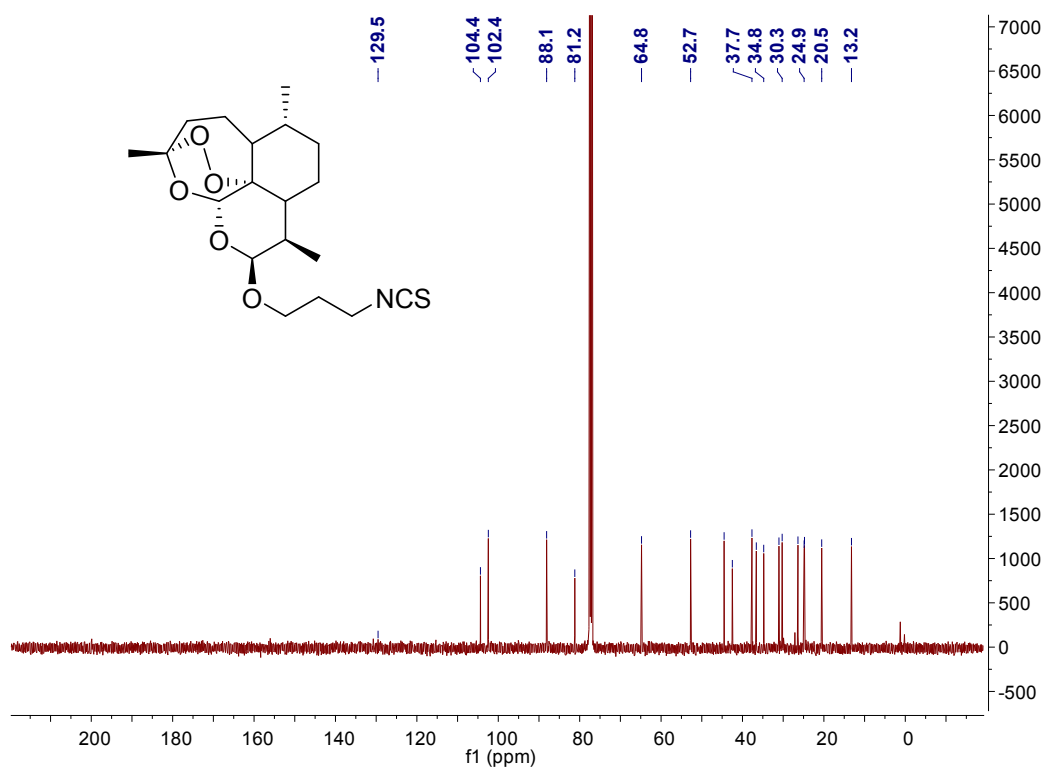

Figure S18. <sup>13</sup>C NMR spectrum of compound 5b

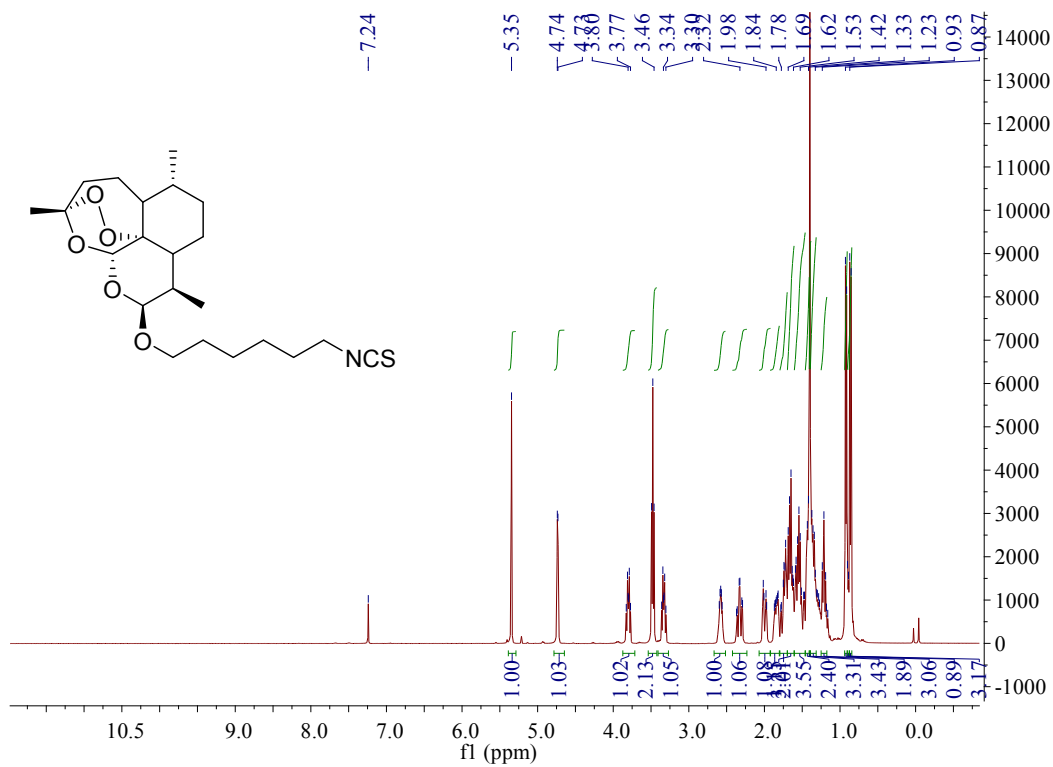

Figure S19.  $^1\text{H}$  NMR spectrum of compound 5c

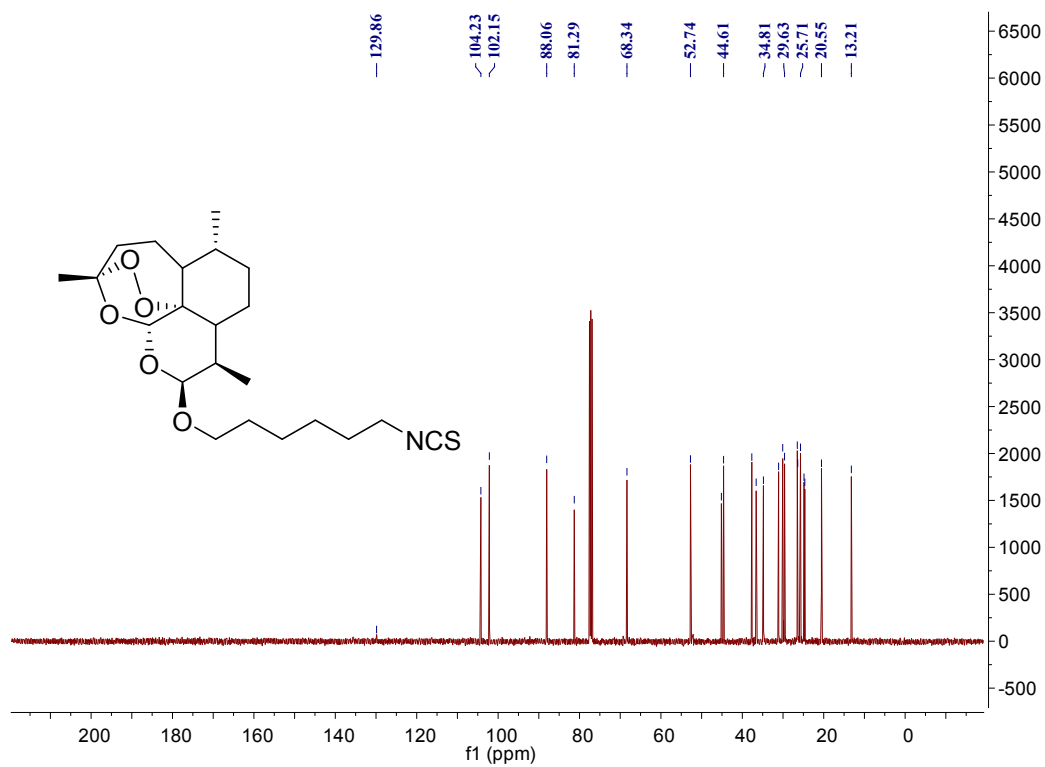

Figure S20.  $^{13}\text{C}$  NMR spectrum of compound 5c

## HR-ESI-MS spectra

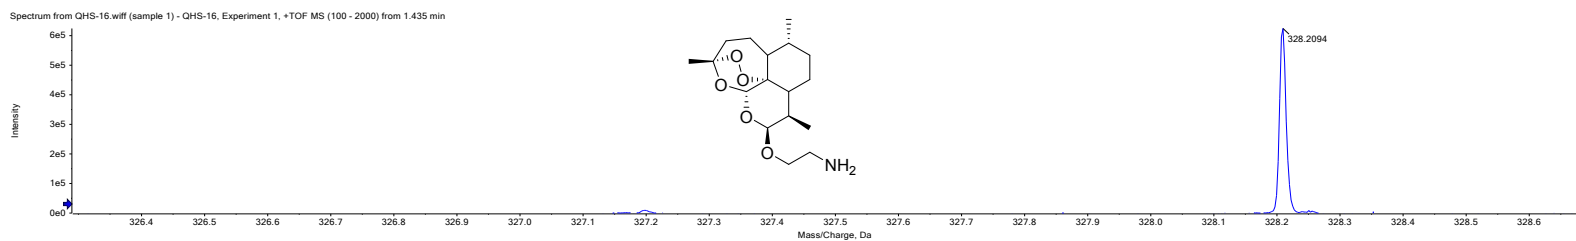

Figure S21. HR-ESI-MS of compound 4a

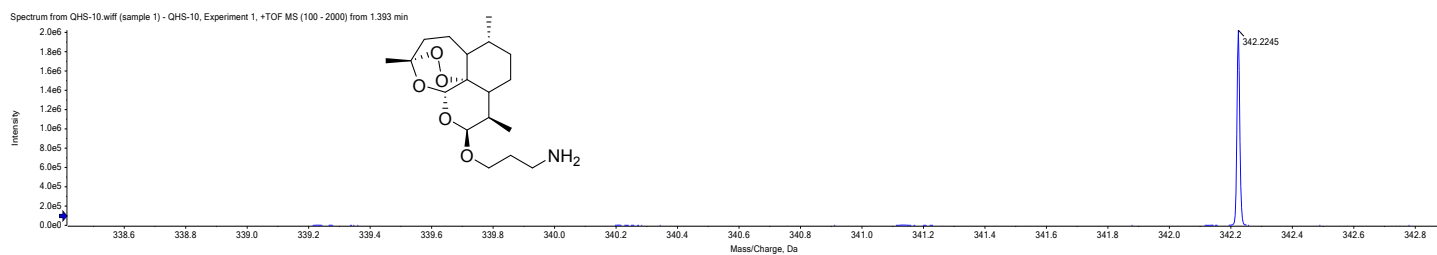

Figure S22. HR-ESI-MS of compound 4b

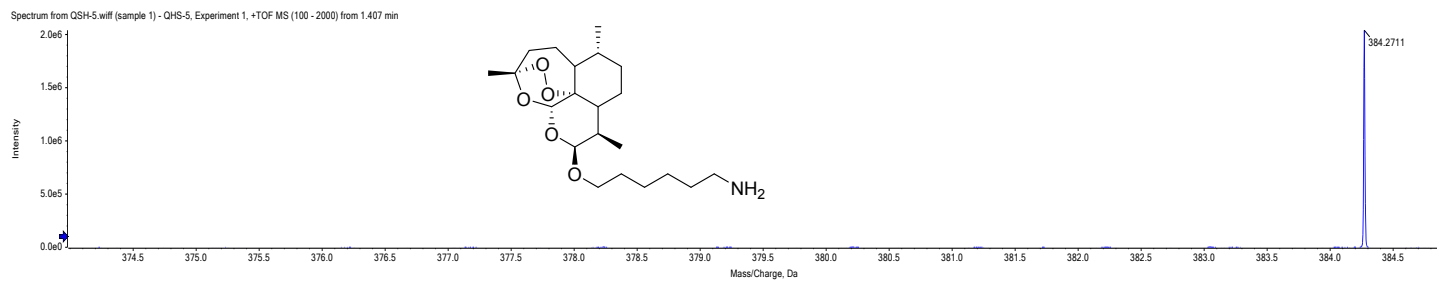

Figure S23. HR-ESI-MS of compound 4c

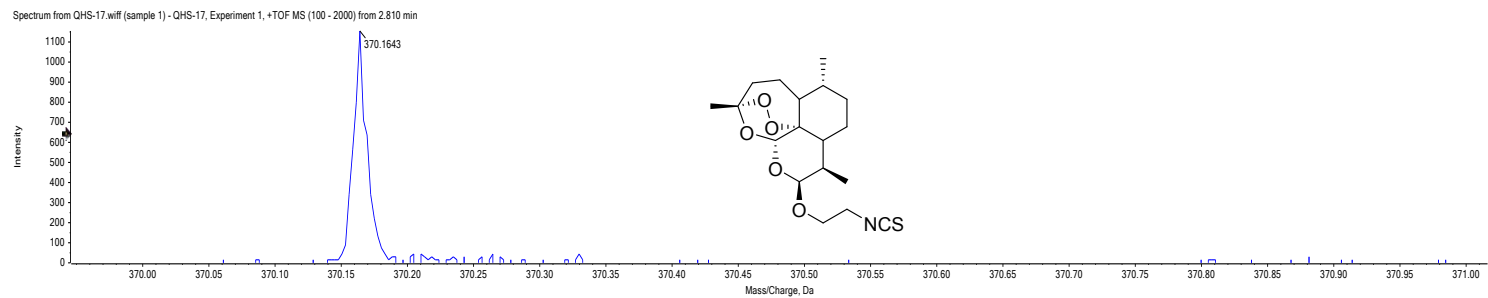

Figure S24. HR-ESI-MS of compound 5a

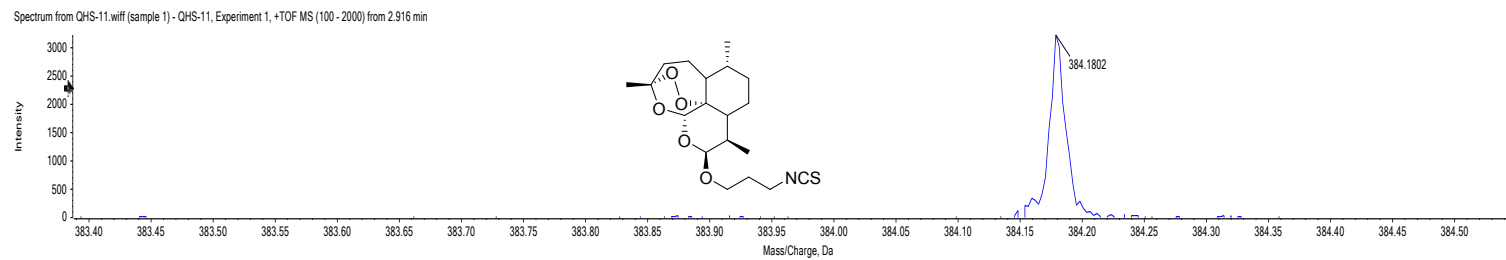

Figure S25. HR-ESI-MS of compound 5b

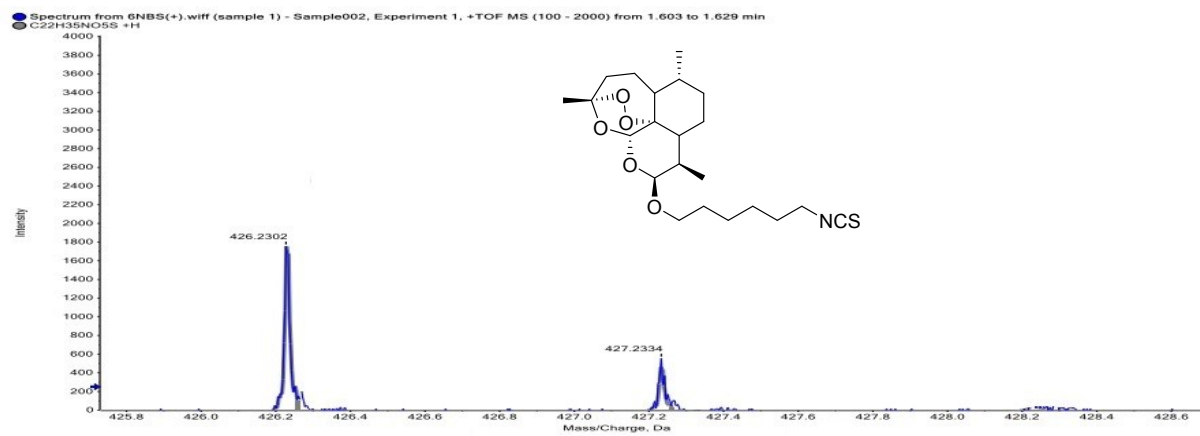

Figure S26. HR-ESI-MS of compound 5b
